# Supplementary material for: Quantifying the polar skyrmion motion barrier in an oxide heterostructure
Source: Royal Society of Chemistry journal article supplement (doi:10.1039/d4nr03686g), 2024-11-12
Supplement: d4nr03686g1.pdf [file d4nr03686g1.pdf]

## Supplementary Information for:

### Quantifying the polar skyrmion motion barrier in an oxide heterostructure

Lizhe Hu<sup>1</sup>, Yuhui Huang<sup>1</sup>, Yongjun Wu<sup>1,2,\*</sup>, Zijian Hong<sup>1,2,\*</sup>

<sup>1</sup> State Key Laboratory of Silicon and Advanced Semiconductor Materials, School of Materials Science and Engineering, Zhejiang University, Hangzhou, Zhejiang 310058, China.

<sup>2</sup> Zhejiang Key Laboratory of Advanced Solid State Energy Storage Technology and Applications, Taizhou Institute of Zhejiang University, Taizhou, Zhejiang 318000, China.

\* Corresponding authors: yongjunwu@zju.edu.cn (Y.W.); hongzijian100@zju.edu.cn (Z.H.)

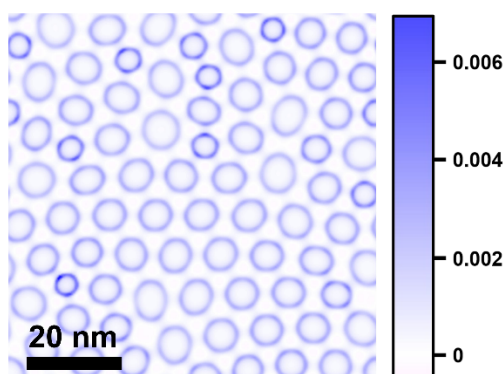

Fig. S1| The Pontryagin density of the initial state with a periodicity of 12 u.c.

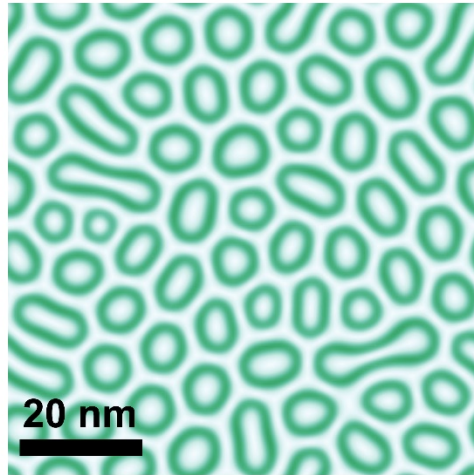

Fig. S2| The pattern of the in-plane polarization with periodicity of 6 u.c. at 300 K.

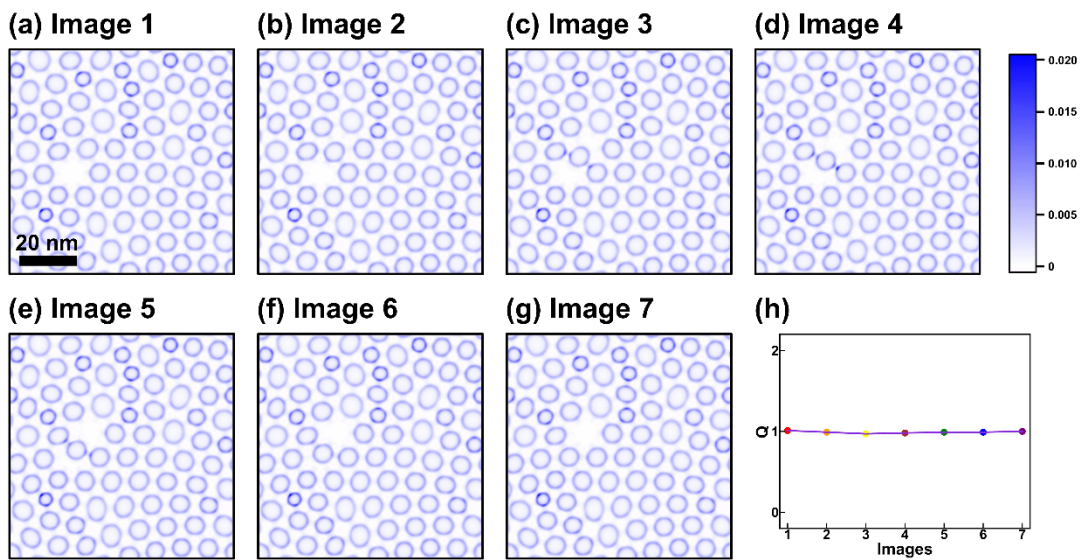

Fig. S3| The Pontryagin density during the migration corresponding to Fig. 3(a-g). (h) The topological charge  $Q$  over the migration process.

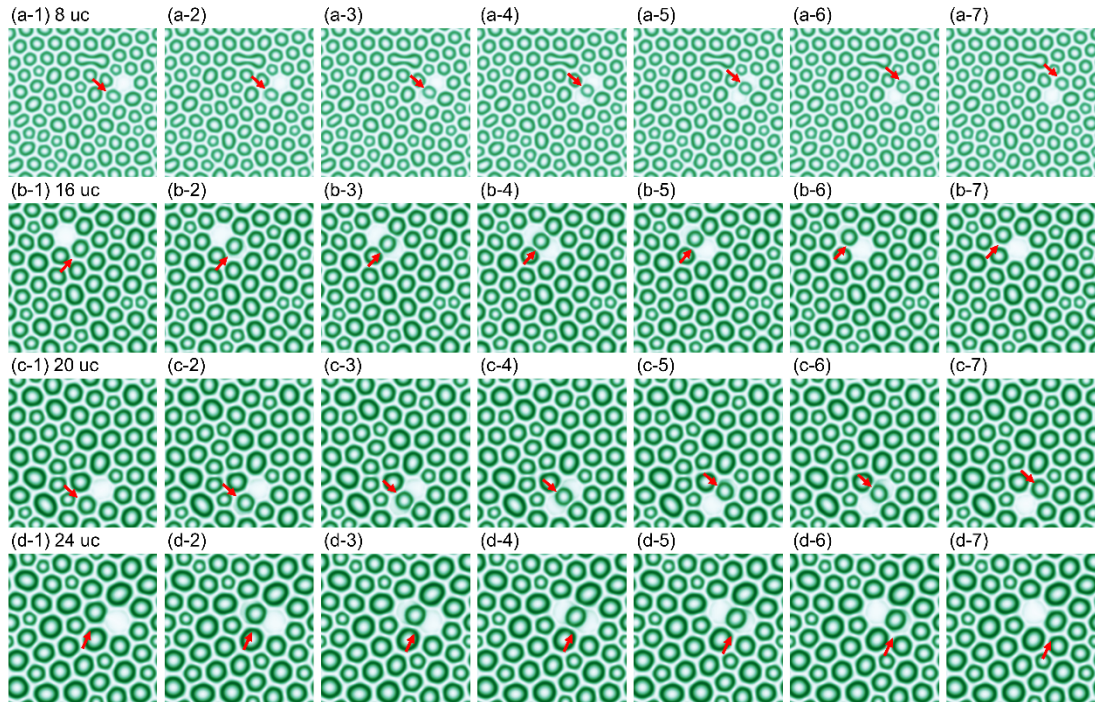

Fig. S4| The migration pathway of 8 u.c. (a-1 to a-7), 16 u.c. (b-1 to b-7), 20 u.c. (c-1 to c-7), 24 u.c. (d-1 to d-7), respectively.

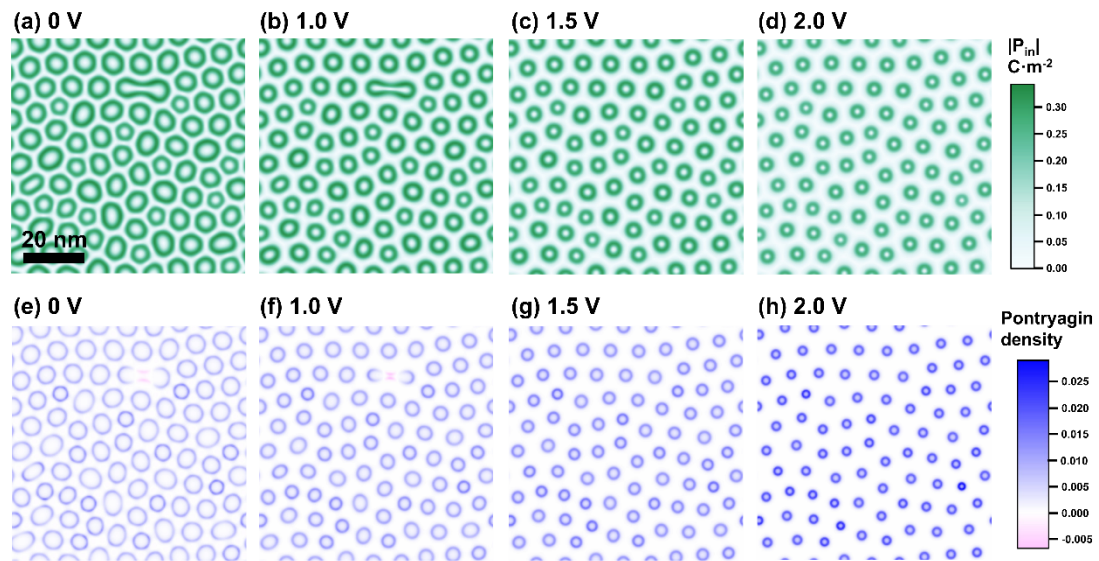

Fig. S5| The polar patterns (a-d) and corresponding Pontryagin density (e-h) of the top PTO layer for the superlattice with a periodicity of 8 u.c. under different applied voltages.

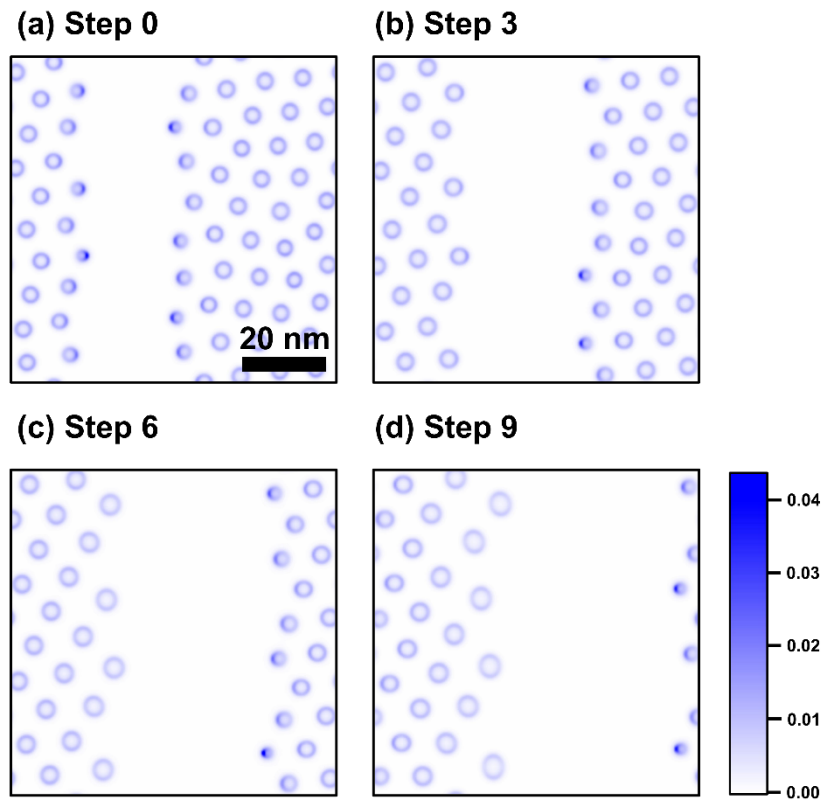

Fig. S6| The Pontryagin density of the system during the skyrmion motion process.
